# Supplementary material
Source: PubMed Central journal article supplement (PMC3831068)
Supplement: ejhg201349x1.pdf [file ejhg201349x1.pdf]

Table S1

Joint probability  $P(M, C_1, C_2, D_1 = 1, D_2 = 1)$ , where  $M, C_1, C_2$  are the respective genotypes of the mother, the first child and the second child;  $D_1 = 1$  and  $D_2 = 1$  indicate that both children are affected; the other parameters are as defined in Table 1 of main text

| <i>Type</i> | $M$ | $C_1$ | $C_2$ | $P(M, C_1, C_2, D_1 = 1, D_2 = 1)$                                                                                                                                                                                                            |
|-------------|-----|-------|-------|-----------------------------------------------------------------------------------------------------------------------------------------------------------------------------------------------------------------------------------------------|
| 1           | 0   | 0     | 0     | $(\mu_{00} + \frac{1}{4}\mu_{01}) \cdot \delta \cdot \delta$                                                                                                                                                                                  |
| 2           | 0   | 1     | 0     | $\frac{1}{4}\mu_{01} \cdot \delta R_1 \cdot \delta$                                                                                                                                                                                           |
| 3           | 0   | 0     | 1     | $\frac{1}{4}\mu_{01} \cdot \delta \cdot \delta R_1$                                                                                                                                                                                           |
| 4           | 0   | 1     | 1     | $(\frac{1}{4}\mu_{01} + \mu_{02}) \cdot \delta R_1 \cdot \delta R_1$                                                                                                                                                                          |
| 5           | 1   | 0     | 0     | $(\frac{1}{4}\mu_{10} + \frac{1}{16}\mu_{11}) \cdot \delta S_1 \cdot \delta S_1$                                                                                                                                                              |
| 6           | 1   | 0     | 1     | $\frac{1}{4}\mu_{10} \cdot \delta S_1 \cdot \delta S_1 R_1 R_{im} + \frac{1}{16}\mu_{11} \cdot \delta S_1 \cdot \delta S_1 R_1 (1 + R_{im})$                                                                                                  |
| 7           | 1   | 0     | 2     | $\frac{1}{16}\mu_{11} \cdot \delta S_1 \cdot \delta S_1 R_2$                                                                                                                                                                                  |
| 8           | 1   | 1     | 0     | $\frac{1}{4}\mu_{10} \cdot \delta S_1 R_1 R_{im} \cdot \delta S_1 + \frac{1}{16}\mu_{11} \cdot \delta S_1 R_1 (1 + R_{im}) \cdot \delta S_1$                                                                                                  |
| 9           | 1   | 1     | 1     | $\frac{1}{4}\mu_{10} \cdot \delta S_1 R_1 R_{im} \cdot \delta S_1 R_1 R_{im} + \frac{1}{4}\mu_{12} \cdot \delta S_1 R_1 \cdot \delta S_1 R_1$<br>$+ \frac{1}{16}\mu_{11} \cdot \delta S_1 R_1 (1 + R_{im}) \cdot \delta S_1 R_1 (1 + R_{im})$ |
| 10          | 1   | 1     | 2     | $\frac{1}{16}\mu_{11} \cdot \delta S_1 R_1 (1 + R_{im}) \cdot \delta S_1 R_2 + \frac{1}{4}\mu_{12} \cdot \delta S_1 R_1 \cdot \delta S_1 R_2$                                                                                                 |
| 11          | 1   | 2     | 0     | $\frac{1}{16}\mu_{11} \cdot \delta S_1 R_2 \cdot \delta S_1$                                                                                                                                                                                  |
| 12          | 1   | 2     | 1     | $\frac{1}{16}\mu_{11} \cdot \delta S_1 R_2 \cdot \delta S_1 R_1 (1 + R_{im}) + \frac{1}{4}\mu_{12} \cdot \delta S_1 R_2 \cdot \delta S_1 R_1$                                                                                                 |
| 13          | 1   | 2     | 2     | $(\frac{1}{16}\mu_{11} + \frac{1}{4}\mu_{12}) \cdot \delta S_1 R_2 \cdot \delta S_1 R_2$                                                                                                                                                      |
| 14          | 2   | 1     | 1     | $(\mu_{20} + \frac{1}{4}\mu_{21}) \cdot \delta S_2 R_1 R_{im} \cdot \delta S_2 R_1 R_{im}$                                                                                                                                                    |
| 15          | 2   | 1     | 2     | $\frac{1}{4}\mu_{21} \cdot \delta S_2 R_1 R_{im} \cdot \delta S_2 R_2$                                                                                                                                                                        |
| 16          | 2   | 2     | 1     | $\frac{1}{4}\mu_{21} \cdot \delta S_2 R_2 \cdot \delta S_2 R_1 R_{im}$                                                                                                                                                                        |
| 17          | 2   | 2     | 2     | $(\frac{1}{4}\mu_{21} + \mu_{22}) \cdot \delta S_2 R_2 \cdot \delta S_2 R_2$                                                                                                                                                                  |

Table S2

Joint probability  $P(M, C_1, C_2, D_1 = 0, D_2 = 1)$ , where  $M, C_1, C_2$  are the respective genotypes of the mother, the first child and the second child;  $D_1 = 0$  and  $D_2 = 1$  indicate that the first child is unaffected while the second child is affected; the other parameters are as defined in Table 1 of main text

| <i>Type</i> | $M$ | $C_1$ | $C_2$ | $P(M, C_1, C_2, D_1 = 0, D_2 = 1)$                                                                                                                                                                                                                              |
|-------------|-----|-------|-------|-----------------------------------------------------------------------------------------------------------------------------------------------------------------------------------------------------------------------------------------------------------------|
| 1           | 0   | 0     | 0     | $(\mu_{00} + \frac{1}{4}\mu_{01}) \cdot (1 - \delta) \cdot \delta$                                                                                                                                                                                              |
| 2           | 0   | 1     | 0     | $\frac{1}{4}\mu_{01} \cdot (1 - \delta R_1) \cdot \delta$                                                                                                                                                                                                       |
| 3           | 0   | 0     | 1     | $\frac{1}{4}\mu_{01} \cdot (1 - \delta) \cdot \delta R_1$                                                                                                                                                                                                       |
| 4           | 0   | 1     | 1     | $(\frac{1}{4}\mu_{01} + \mu_{02}) \cdot (1 - \delta R_1) \cdot \delta R_1$                                                                                                                                                                                      |
| 5           | 1   | 0     | 0     | $(\frac{1}{4}\mu_{10} + \frac{1}{16}\mu_{11}) \cdot (1 - \delta S_1) \cdot \delta S_1$                                                                                                                                                                          |
| 6           | 1   | 0     | 1     | $\frac{1}{4}\mu_{10} \cdot (1 - \delta S_1) \cdot \delta S_1 R_1 R_{im} + \frac{1}{16}\mu_{11} \cdot (1 - \delta S_1) \cdot \delta S_1 R_1 (1 + R_{im})$                                                                                                        |
| 7           | 1   | 0     | 2     | $\frac{1}{16}\mu_{11} \cdot (1 - \delta S_1) \cdot \delta S_1 R_2$                                                                                                                                                                                              |
| 8           | 1   | 1     | 0     | $\frac{1}{4}\mu_{10} \cdot (1 - \delta S_1 R_1 R_{im}) \cdot \delta S_1 + \frac{1}{16}\mu_{11} \cdot [2 - \delta S_1 R_1 (1 + R_{im})] \cdot \delta S_1$                                                                                                        |
| 9           | 1   | 1     | 1     | $\frac{1}{4}\mu_{10} \cdot (1 - \delta S_1 R_1 R_{im}) \cdot \delta S_1 R_1 R_{im} + \frac{1}{4}\mu_{12} \cdot (1 - \delta S_1 R_1) \cdot \delta S_1 R_1$<br>$+ \frac{1}{16}\mu_{11} \cdot [2 - \delta S_1 R_1 (1 + R_{im})] \cdot \delta S_1 R_1 (1 + R_{im})$ |
| 10          | 1   | 1     | 2     | $\frac{1}{16}\mu_{11} \cdot [2 - \delta S_1 R_1 (1 + R_{im})] \cdot \delta S_1 R_2 + \frac{1}{4}\mu_{12} \cdot (1 - \delta S_1 R_1) \cdot \delta S_1 R_2$                                                                                                       |
| 11          | 1   | 2     | 0     | $\frac{1}{16}\mu_{11} \cdot (1 - \delta S_1 R_2) \cdot \delta S_1$                                                                                                                                                                                              |
| 12          | 1   | 2     | 1     | $\frac{1}{16}\mu_{11} \cdot (1 - \delta S_1 R_2) \cdot \delta S_1 R_1 (1 + R_{im}) + \frac{1}{4}\mu_{12} \cdot (1 - \delta S_1 R_2) \cdot \delta S_1 R_1$                                                                                                       |
| 13          | 1   | 2     | 2     | $(\frac{1}{16}\mu_{11} + \frac{1}{4}\mu_{12}) \cdot (1 - \delta S_1 R_2) \cdot \delta S_1 R_2$                                                                                                                                                                  |
| 14          | 2   | 1     | 1     | $(\mu_{20} + \frac{1}{4}\mu_{21}) \cdot (1 - \delta S_2 R_1 R_{im}) \cdot \delta S_2 R_1 R_{im}$                                                                                                                                                                |
| 15          | 2   | 1     | 2     | $\frac{1}{4}\mu_{21} \cdot (1 - \delta S_2 R_1 R_{im}) \cdot \delta S_2 R_2$                                                                                                                                                                                    |
| 16          | 2   | 2     | 1     | $\frac{1}{4}\mu_{21} \cdot (1 - \delta S_2 R_2) \cdot \delta S_2 R_1 R_{im}$                                                                                                                                                                                    |
| 17          | 2   | 2     | 2     | $(\frac{1}{4}\mu_{21} + \mu_{22}) \cdot (1 - \delta S_2 R_2) \cdot \delta S_2 R_2$                                                                                                                                                                              |

Table S3

Joint probability  $P(M, C_1, C_2, D_1 = 0, D_2 = 0)$ , where  $M, C_1, C_2$  are the respective genotypes of the mother, the first child and the second child,  $D_1 = 0$  and  $D_2 = 0$  indicate that both children are unaffected; the other parameters are as defined in Table 1 of main text

| <i>Type</i> | $M$ | $C_1$ | $C_2$ | $P(M, C_1, C_2, D_1 = 0, D_2 = 0)$                                                                                                                                                                                                                                                |
|-------------|-----|-------|-------|-----------------------------------------------------------------------------------------------------------------------------------------------------------------------------------------------------------------------------------------------------------------------------------|
| 1           | 0   | 0     | 0     | $(\mu_{00} + \frac{1}{4}\mu_{01}) \cdot (1 - \delta) \cdot (1 - \delta)$                                                                                                                                                                                                          |
| 2           | 0   | 1     | 0     | $\frac{1}{4}\mu_{01} \cdot (1 - \delta R_1) \cdot (1 - \delta)$                                                                                                                                                                                                                   |
| 3           | 0   | 0     | 1     | $\frac{1}{4}\mu_{01} \cdot (1 - \delta) \cdot (1 - \delta R_1)$                                                                                                                                                                                                                   |
| 4           | 0   | 1     | 1     | $(\frac{1}{4}\mu_{01} + \mu_{02}) \cdot (1 - \delta R_1) \cdot (1 - \delta R_1)$                                                                                                                                                                                                  |
| 5           | 1   | 0     | 0     | $(\frac{1}{4}\mu_{10} + \frac{1}{16}\mu_{11}) \cdot (1 - \delta S_1) \cdot (1 - \delta S_1)$                                                                                                                                                                                      |
| 6           | 1   | 0     | 1     | $\frac{1}{4}\mu_{10} \cdot (1 - \delta S_1) \cdot (1 - \delta S_1 R_1 R_{im}) + \frac{1}{16}\mu_{11} \cdot (1 - \delta S_1) \cdot [2 - \delta S_1 R_1 (1 + R_{im})]$                                                                                                              |
| 7           | 1   | 0     | 2     | $\frac{1}{16}\mu_{11} \cdot (1 - \delta S_1) \cdot (1 - \delta S_1 R_2)$                                                                                                                                                                                                          |
| 8           | 1   | 1     | 0     | $\frac{1}{4}\mu_{10} \cdot (1 - \delta S_1 R_1 R_{im}) \cdot (1 - \delta S_1) + \frac{1}{16}\mu_{11} \cdot [2 - \delta S_1 R_1 (1 + R_{im})] \cdot (1 - \delta S_1)$                                                                                                              |
| 9           | 1   | 1     | 1     | $\frac{1}{4}\mu_{10} \cdot (1 - \delta S_1 R_1 R_{im}) \cdot (1 - \delta S_1 R_1 R_{im}) + \frac{1}{4}\mu_{12} \cdot (1 - \delta S_1 R_1) \cdot (1 - \delta S_1 R_1)$<br>$+ \frac{1}{16}\mu_{11} \cdot [2 - \delta S_1 R_1 (1 + R_{im})] \cdot [2 - \delta S_1 R_1 (1 + R_{im})]$ |
| 10          | 1   | 1     | 2     | $\frac{1}{16}\mu_{11} \cdot [2 - \delta S_1 R_1 (1 + R_{im})] \cdot (1 - \delta S_1 R_2) + \frac{1}{4}\mu_{12} \cdot (1 - \delta S_1 R_1) \cdot (1 - \delta S_1 R_2)$                                                                                                             |
| 11          | 1   | 2     | 0     | $\frac{1}{16}\mu_{11} \cdot (1 - \delta S_1 R_2) \cdot (1 - \delta S_1)$                                                                                                                                                                                                          |
| 12          | 1   | 2     | 1     | $\frac{1}{16}\mu_{11} \cdot (1 - \delta S_1 R_2) \cdot [2 - \delta S_1 R_1 (1 + R_{im})] + \frac{1}{4}\mu_{12} \cdot (1 - \delta S_1 R_2) \cdot (1 - \delta S_1 R_1)$                                                                                                             |
| 13          | 1   | 2     | 2     | $(\frac{1}{16}\mu_{11} + \frac{1}{4}\mu_{12}) \cdot (1 - \delta S_1 R_2) \cdot (1 - \delta S_1 R_2)$                                                                                                                                                                              |
| 14          | 2   | 1     | 1     | $(\mu_{20} + \frac{1}{4}\mu_{21}) \cdot (1 - \delta S_2 R_1 R_{im}) (1 - \delta S_2 R_1 R_{im})$                                                                                                                                                                                  |
| 15          | 2   | 1     | 2     | $\frac{1}{4}\mu_{21} \cdot (1 - \delta S_2 R_1 R_{im}) \cdot (1 - \delta S_2 R_2)$                                                                                                                                                                                                |
| 16          | 2   | 2     | 1     | $\frac{1}{4}\mu_{21} \cdot (1 - \delta S_2 R_2) \cdot (1 - \delta S_2 R_1 R_{im})$                                                                                                                                                                                                |
| 17          | 2   | 2     | 2     | $(\frac{1}{4}\mu_{21} + \mu_{22}) \cdot (1 - \delta S_2 R_2) \cdot (1 - \delta S_2 R_2)$                                                                                                                                                                                          |
